# Supplementary material for: Mutations in RECQL Gene Are Associated with Predisposition to Breast Cancer
Source: PubMed Central journal article supplement (PMC4422667; doi:10.1371/journal.pgen.1005228), 2015-05-06

S4 Fig.

A

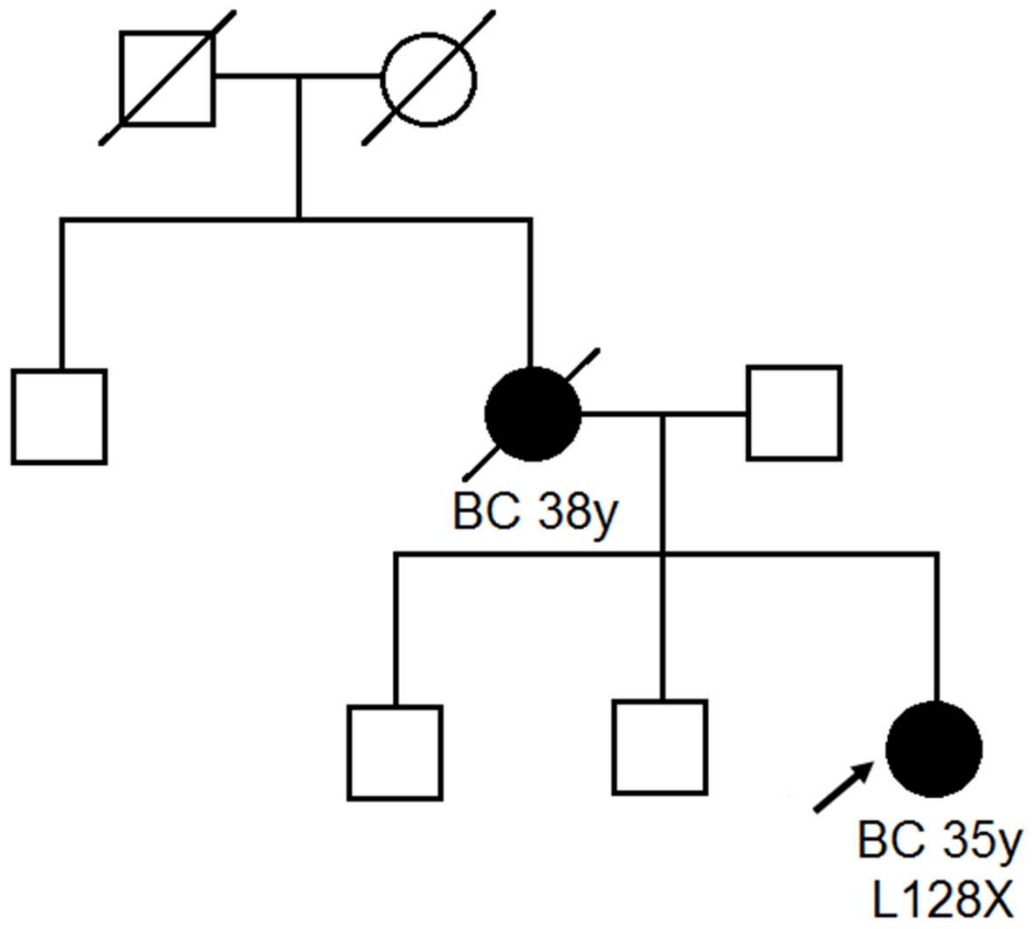

B

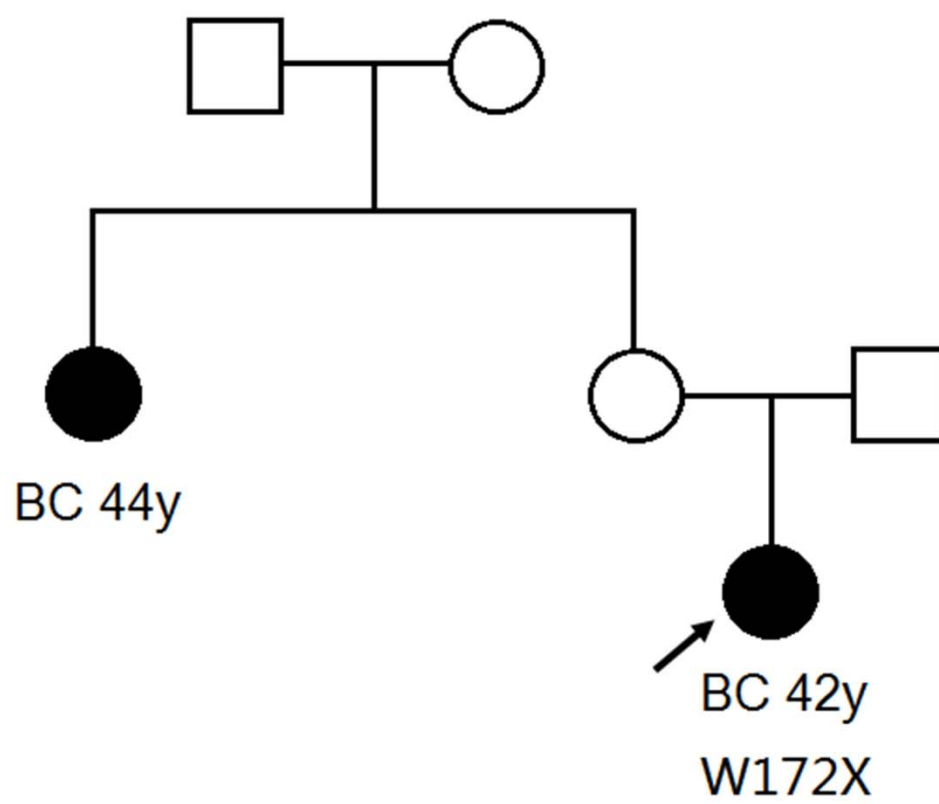

c

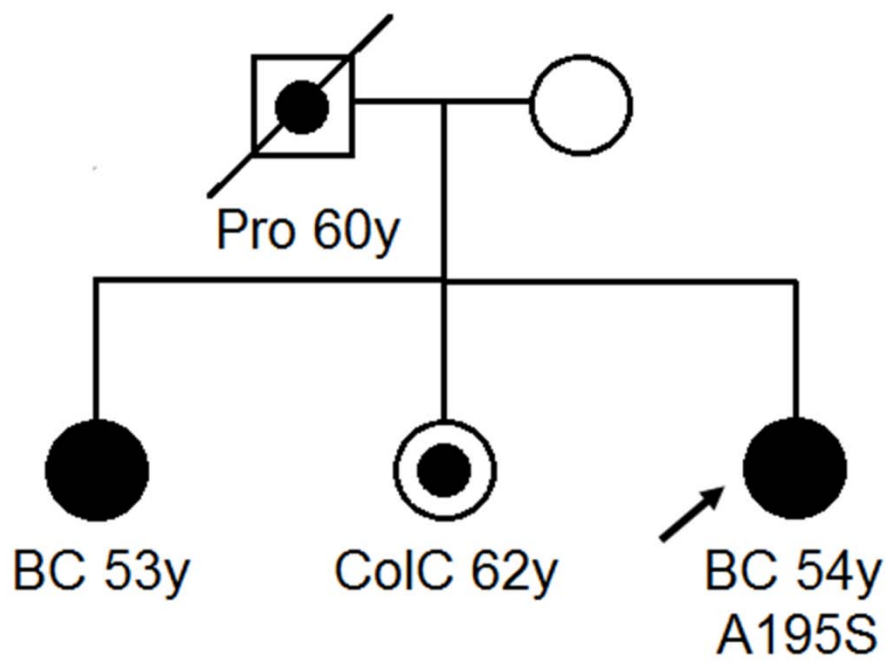

D

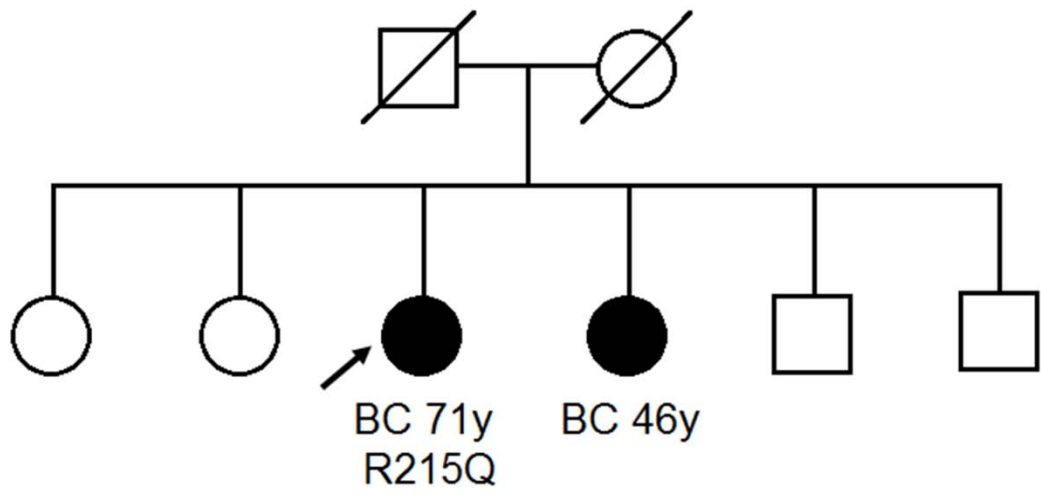

E

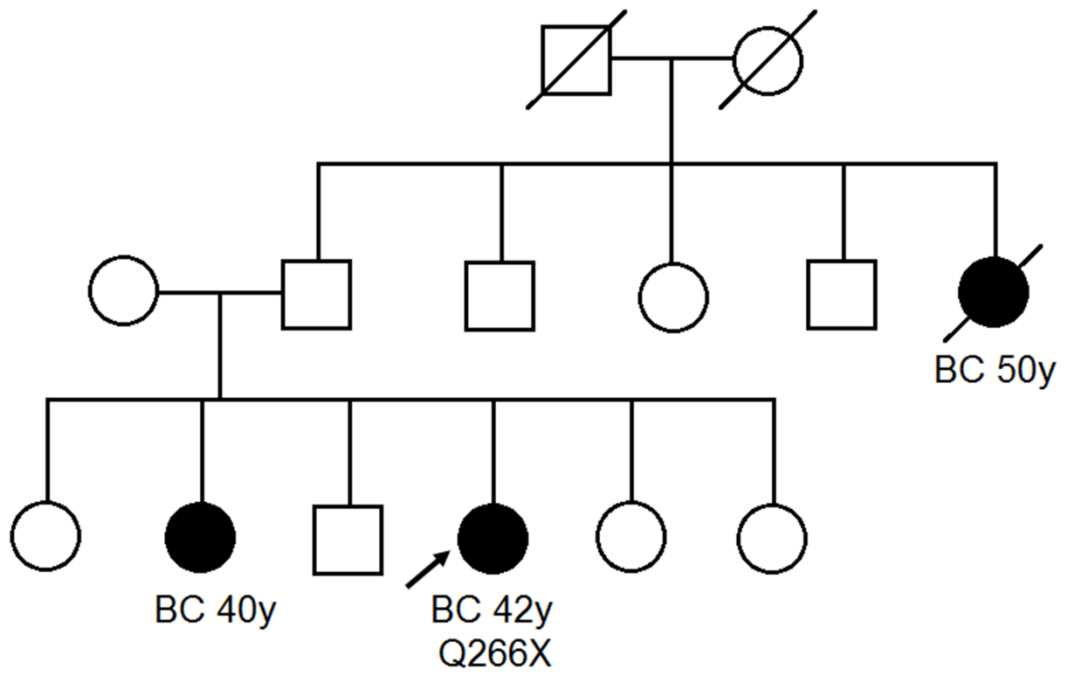

F

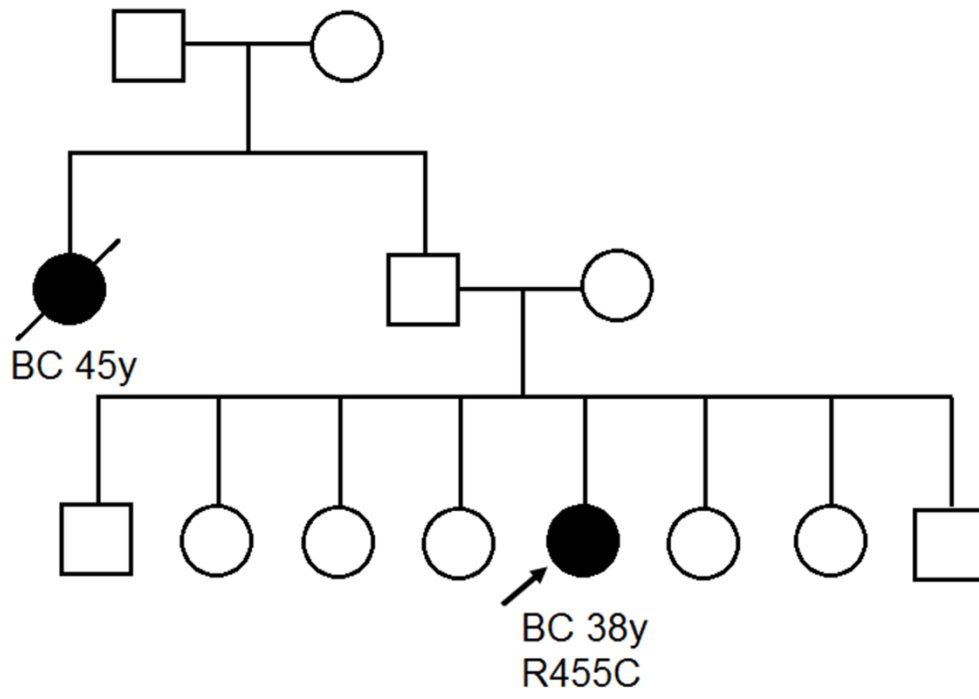

G

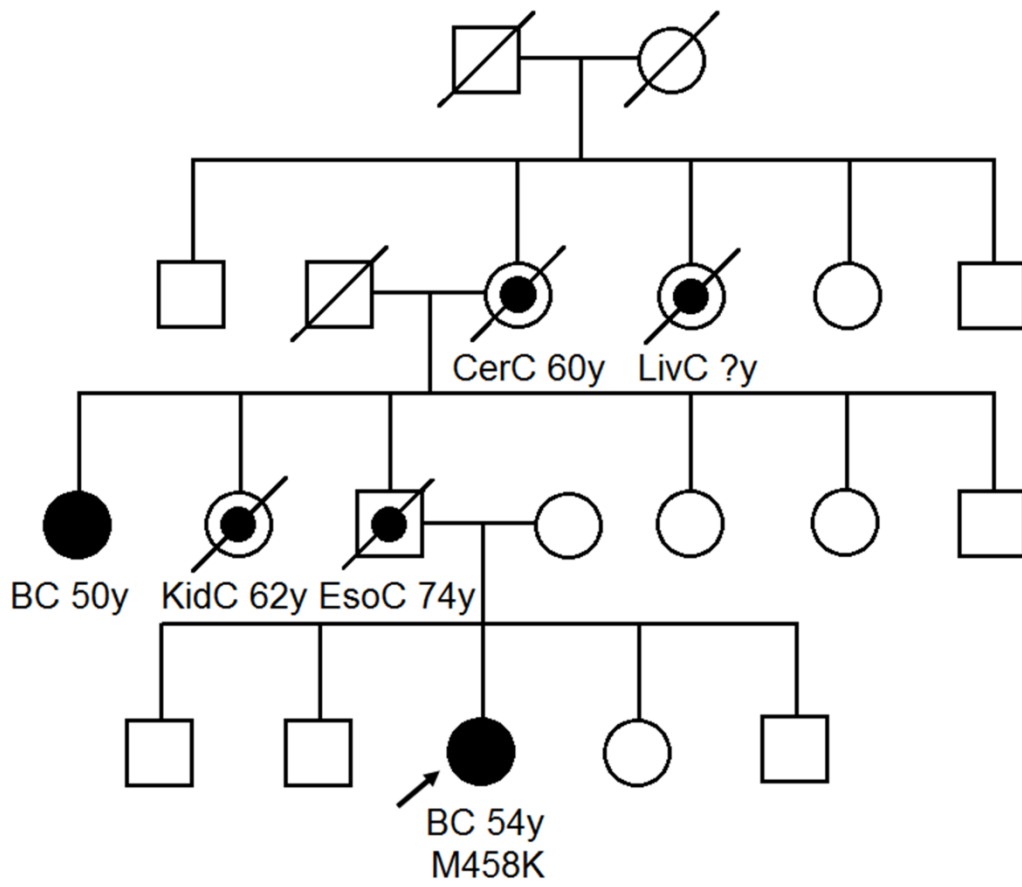

H

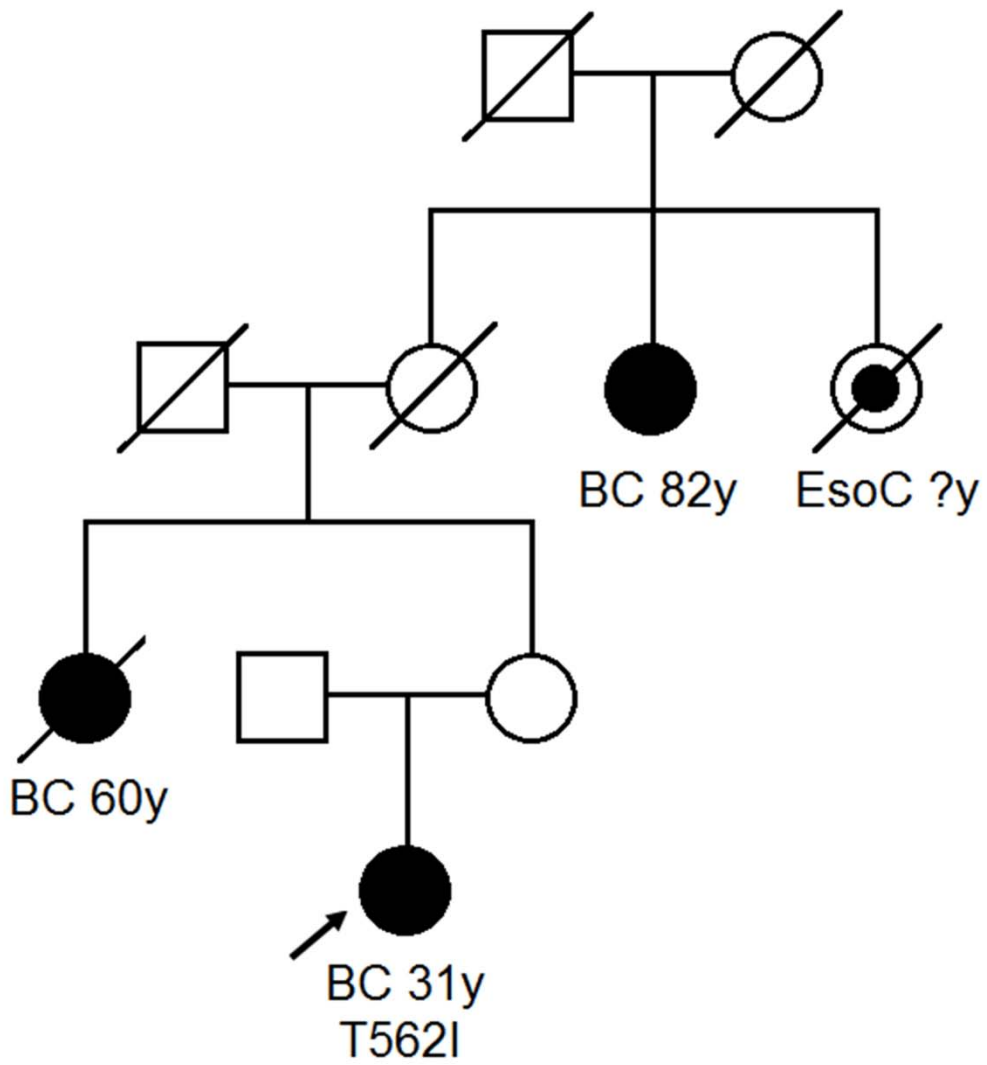

Supplement: pgen.1005228.s004.pdf [file pgen.1005228.s004.pdf]
