# Supplementary material for: Mutations in RECQL Gene Are Associated with Predisposition to Breast Cancer
Source: PubMed Central journal article supplement (PMC4422667; doi:10.1371/journal.pgen.1005228), 2015-05-06

S5 Fig.  
A

c.395-2A>G

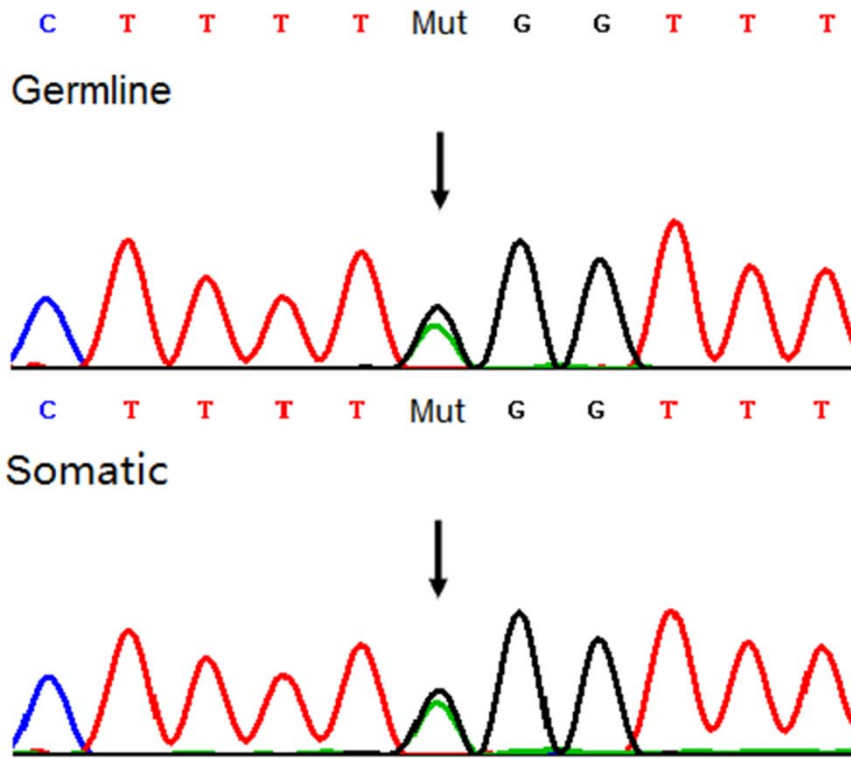

B

c.583G>T; p.A195S

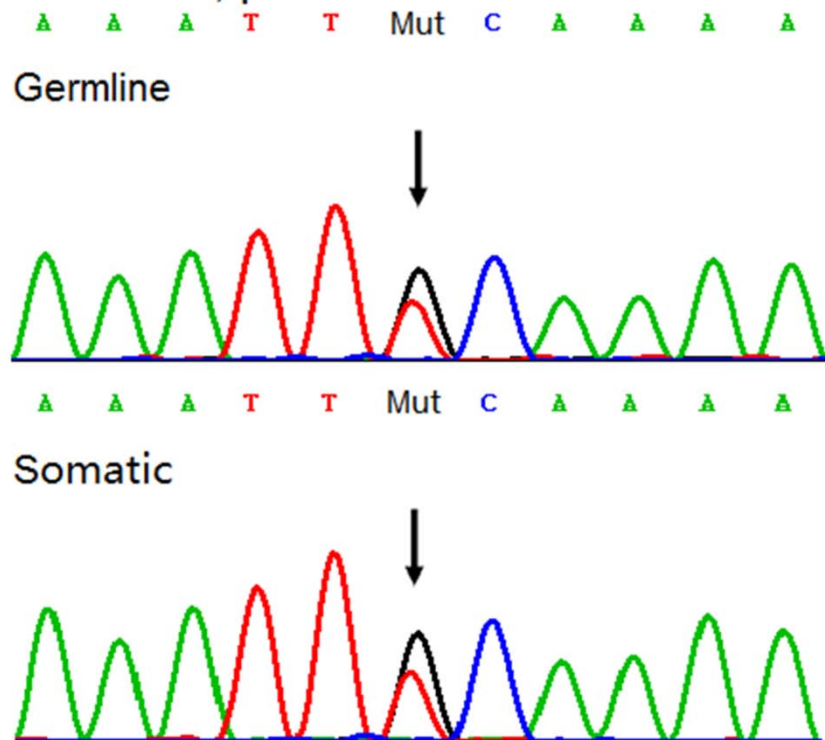

C

c.796C>T; p.Q266X

A T G C T Mut A G A A A

Germline

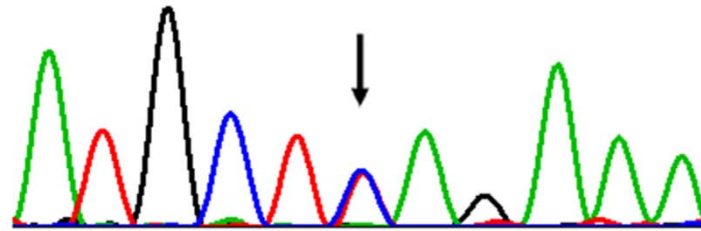

A T G C T Mut A G A A A

Somatic

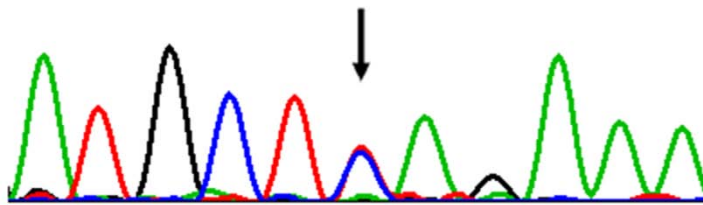

D

c.1373T>A; p.M458K

G T T G A Mut G G C T C A

Germline

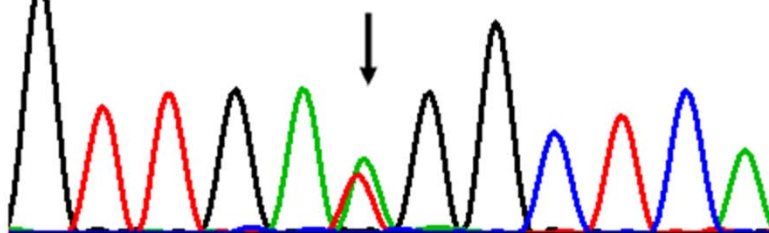

G T T G A Mut G G C T C A

Somatic

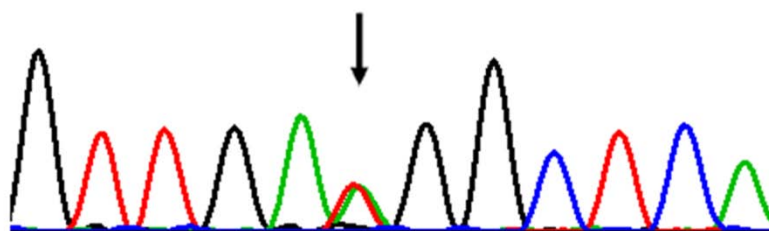

E

c.1685C>T; p.T562I

T T T T A Mut A G C T T

Germline

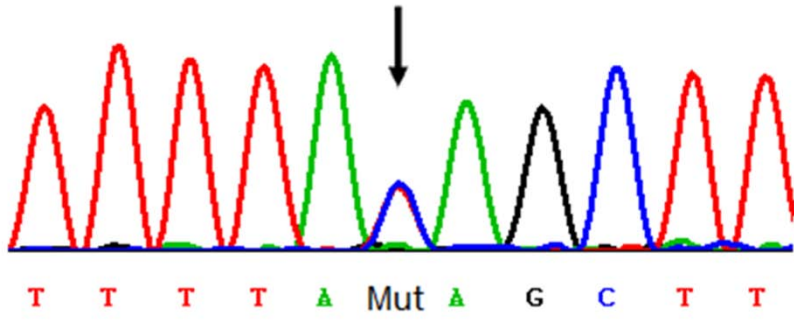

Somatic

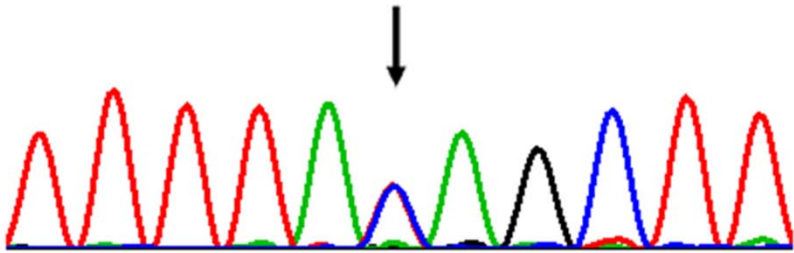

Supplement: pgen.1005228.s005.pdf [file pgen.1005228.s005.pdf]
